# Supplementary material for: Hemocompatibility of super-repellent surfaces: current and future
Source: Royal Society of Chemistry journal article supplement (doi:10.1039/c9mh00051h), 2019-01-01
Supplement: c9mh00051h1.pdf [file c9mh00051h1.pdf]

## Supplementary Information

### **Hemocompatibility of Super-Repellent surfaces: Current and Future**

Sanli Movafaghi,<sup>a</sup> Wei Wang,<sup>a</sup> David L. Bark Jr.,<sup>a,b</sup> Lakshmi P. Dasi,<sup>\*c</sup> Ketul C. Papat<sup>\*a,b</sup> and Arun K. Kota<sup>\*a,b,d</sup>

<sup>a</sup> Department of Mechanical Engineering, Colorado State University, Fort Collins, CO 80523, USA. E-mail: ketul.papat@colostate.edu; arun.kota@colostate.edu

<sup>b</sup> School of Biomedical Engineering, Colorado State University, Fort Collins, CO 80523, USA.

<sup>c</sup> Department of Biomedical Engineering, The Ohio State University, Columbus, OH 43210, USA. E-mail: dasi.1@osu.edu

<sup>d</sup> Department of Chemical & Biological Engineering, Colorado State University, Fort Collins, CO 80523, USA.

**Table S1. The blood components and biological terms in the context of blood-material interactions.**

| Blood components      | Description                                                                                                                                     |
|-----------------------|-------------------------------------------------------------------------------------------------------------------------------------------------|
| Albumin               | Plasma protein that does not bind to platelets.                                                                                                 |
| Plasma                | The liquid portion of blood that serves as a transport system for blood cells.                                                                  |
| Erythrocyte           | Cell that carries oxygen and plays a major role in blood viscosity.                                                                             |
| Fibrinogen            | Plasma protein involved in platelet adhesion at low shear stress. It can be converted to fibrin by thrombin.                                    |
| Leukocyte             | White blood cells, which aim to attack foreign bodies.                                                                                          |
| Lymphocyte            | White blood cells that respond to antigens (toxins or foreign bodies) for specific responses.                                                   |
| Monocyte              | The largest leukocyte. It is involved in phagocytosis (ingestion of bacteria or other material), antigen presentation, and cytokine production. |
| Neutrophil            | The most abundant leukocyte that is important in presenting antigens.                                                                           |
| Plasma proteins       | Proteins found in blood plasma.                                                                                                                 |
| Platelet              | Anucleate cell involved in hemostasis and thrombosis.                                                                                           |
| von Willebrand Factor | Plasma protein involved in platelet adhesion at high shear stress.                                                                              |

| Biological terms          | Description                                                                                                                                            |
|---------------------------|--------------------------------------------------------------------------------------------------------------------------------------------------------|
| ADP                       | An important compound in metabolism that can act as a platelet activation agonist.                                                                     |
| $\alpha$ -granule         | Granules within platelets that can release upon platelet activation. The contents of these granules include growth factors and prothrombotic proteins. |
| $\alpha_{IIB}\beta_{III}$ | A major integrin on platelets that binds to proteins, including fibrinogen, von Willebrand Factor, and fibronectin.                                    |
| Anticoagulant             | A drug used to prevent coagulation.                                                                                                                    |
| Anti-inflammatory         | Conditions that resist or prevent inflammation.                                                                                                        |
| Antiplatelet therapy      | A drug used to prevent platelet function.                                                                                                              |
| Anti-thrombotic           | Conditions that prevent or reduce the formation of blood clots.                                                                                        |
| Apoptosis                 | Programmed death of a cell.                                                                                                                            |
| Coagulation cascade       | Secondary hemostasis, commonly known as blood clotting, that is involved in fibrin formation.                                                          |
| Complement System         | A part of the immune system (consisting of over 20 plasma proteins) that plays a significant role in body's defense mechanism.                         |
| Cytokine                  | Proteins secreted by certain cells of the immune system. They are signaling molecules that mediate and regulate immune response.                       |
| Differentiation           | Process by which a less specialized cell develops to become more distinct in form and function.                                                        |
| Endothelialization        | The process of endothelial cells (in the inner lining of blood vessels) multiplying or migrating to a region.                                          |
| Extracellular matrix      | A three dimensional network of macromolecules outside of cells that provides structural support and can be involved in biochemical transport.          |
| Fibrin                    | A protein that forms a fibrous mesh that is involved in blood clots.                                                                                   |
| Fibrinolysis              | Breakdown of fibrin.                                                                                                                                   |
| Fibroblast                | A cell commonly involved in connective tissue that is important to wound healing.                                                                      |
| Fibrosis                  | Formation of excess fibrous connective tissue.                                                                                                         |
| Foreign body giant cells  | A collection of fused macrophages, generated in response to large foreign bodies.                                                                      |
| Hemoglobin                | Protein responsible for oxygen transport in erythrocytes.                                                                                              |

|                                |                                                                                                                                                                                       |
|--------------------------------|---------------------------------------------------------------------------------------------------------------------------------------------------------------------------------------|
| Hemolysis                      | Rupture of the erythrocyte membrane.                                                                                                                                                  |
| Inflammation                   | Immune response via which white blood cells protect the body from foreign bodies.                                                                                                     |
| Integrin                       | A protein that usually has the mechanical function of attaching a cell to a surface.                                                                                                  |
| Intimal hyperplasia            | Thickening of the intima (middle layer of a blood vessel).                                                                                                                            |
| Macrophage                     | A white blood cell that engulfs foreign bodies.                                                                                                                                       |
| Neutrophil extracellular traps | A meshwork of DNA fibers extruded from neutrophils.                                                                                                                                   |
| Phosphatidylserine             | A phospholipid, normally present on the interior side of cell membranes.                                                                                                              |
| Platelet activation agonists   | Stimulators for platelet activation.                                                                                                                                                  |
| Polymorphonuclear leukocytes   | Leukocytes with multi-lobed nucleus. Also called granulocytes.                                                                                                                        |
| Procoagulant                   | Conditions that support coagulation.                                                                                                                                                  |
| Pro-inflammatory               | Conditions that support inflammation.                                                                                                                                                 |
| Protein denaturation           | Process in which protein structure lose structure.                                                                                                                                    |
| Prothrombotic                  | A condition that supports thrombosis.                                                                                                                                                 |
| Protofibrils                   | Accumulation of fibrin monomers into a strand.                                                                                                                                        |
| Thrombin                       | A potent platelet activation agonist and a substance that is critical for converting fibrinogen to fibrin.                                                                            |
| Thrombosis                     | The process of or occurrence of thrombus formation.                                                                                                                                   |
| Thromboxane                    | A platelet activation agonist that can be released from platelet alpha granules.                                                                                                      |
| Thrombus                       | The formation of blockage in the vascular system with constituents that depend on local flow conditions, but can involve various combinations of platelets, fibrin, and erythrocytes. |
| Toll-like receptor 4           | Immune receptor involved in recognizing molecules presented by pathogens.                                                                                                             |
